# Supplementary material
Source: PubMed Central journal article supplement (PMC4136416)
Supplement: NIHMS613491-supplement-Supp_2.pdf [file NIHMS613491-supplement-Supp_2.pdf]

**Supplementary Table 2 – List of ACAD homologs from all taxa considered in this study.** Taxa marked as follows: \* = fully sequenced genomes, p = partially sequenced, ^ = at assembly stage. Homologs are color coded as follows: red = GCD, dark blue = IVD, green = ACAD10/11, purple = VLCAD/ACAD9, yellow = LCAD, light blue = IBD, brown = MCAD, orange = SCAD, and pink = SBCAD. Accession numbers of sequences exhibiting similarity to ACAD homologs at e-value smaller than  $1 \times 10^{-10}$  are listed. Robust identification of human SCAD, MCAD, and SBCAD homologs was possible only within eukaryotic lineages (see text) and therefore is omitted in prokaryotic taxa.

| Superkindom | Phylum/Class/other | Order                                  | Species                                                                                                                                                                                                                                  | ACAD homologs (e smaller than -10)                                                                                                                                                                                                                                                                                                                                                               |                                                                                                                                                                                                                                                                                                                                                                                                                                              |                                                                                                                                                                                                                  |
|-------------|--------------------|----------------------------------------|------------------------------------------------------------------------------------------------------------------------------------------------------------------------------------------------------------------------------------------|--------------------------------------------------------------------------------------------------------------------------------------------------------------------------------------------------------------------------------------------------------------------------------------------------------------------------------------------------------------------------------------------------|----------------------------------------------------------------------------------------------------------------------------------------------------------------------------------------------------------------------------------------------------------------------------------------------------------------------------------------------------------------------------------------------------------------------------------------------|------------------------------------------------------------------------------------------------------------------------------------------------------------------------------------------------------------------|
| ARCHAEA     | Crenarchaeota      | Desulfurococcales                      | <i>Aeropyrum pernix K1*</i>                                                                                                                                                                                                              | NP148561, NP148093, NP148425                                                                                                                                                                                                                                                                                                                                                                     |                                                                                                                                                                                                                                                                                                                                                                                                                                              |                                                                                                                                                                                                                  |
|             |                    | Thermoproteales                        | <i>Pyrobaculum aerophilum str. IM2*</i>                                                                                                                                                                                                  | NP559742, NP560039, NP560052, NP559264                                                                                                                                                                                                                                                                                                                                                           |                                                                                                                                                                                                                                                                                                                                                                                                                                              |                                                                                                                                                                                                                  |
|             | Euryarchaeota      | Archaeoglobi                           |                                                                                                                                                                                                                                          | <i>Archaeoglobus fulgidus DSM 4304*</i>                                                                                                                                                                                                                                                                                                                                                          | NP069824, NP069037, NP069797, NP069505, NP070881, NP071069, NP069859, NP069272, NP069970, NP070122, NP069679, NP071100, NP070004, NP_069334                                                                                                                                                                                                                                                                                                  |                                                                                                                                                                                                                  |
|             |                    |                                        | Halobacteriales                                                                                                                                                                                                                          |                                                                                                                                                                                                                                                                                                                                                                                                  | <i>Haloarcula marismortui ATCC 43049*</i>                                                                                                                                                                                                                                                                                                                                                                                                    | YP136545, YP136554, YP135465, YP135559, YP135752, YP136557, YP135474, YP135909, YP138141                                                                                                                         |
|             |                    |                                        |                                                                                                                                                                                                                                          | <i>Halobacterium sp. NRC-1*</i>                                                                                                                                                                                                                                                                                                                                                                  | NP281084, NP279692, NP444213, NP279453, NP279765, NP280305                                                                                                                                                                                                                                                                                                                                                                                   |                                                                                                                                                                                                                  |
|             |                    |                                        | <i>Natronomonas pharaonis DSM 2160*</i>                                                                                                                                                                                                  | YP326960, YP327716, YP326534, YP327376, YP330856, YP330754, YP330836, YP327151, YP326964, YP326456, YP326591, YP327116                                                                                                                                                                                                                                                                           |                                                                                                                                                                                                                                                                                                                                                                                                                                              |                                                                                                                                                                                                                  |
|             |                    | Thermoplasmatales                      |                                                                                                                                                                                                                                          | <i>Picrophilus torridus DSM 9790*</i>                                                                                                                                                                                                                                                                                                                                                            | YP023608, YP023967, YP023802, YP024174 (scad?), YP024237, YP023803, YP023802                                                                                                                                                                                                                                                                                                                                                                 |                                                                                                                                                                                                                  |
|             |                    |                                        |                                                                                                                                                                                                                                          | <i>Thermoplasma acidophilum DSM 1728*</i>                                                                                                                                                                                                                                                                                                                                                        | NP393877, NP393708, NP393775, NP394434, NP394916, NP394916, NP394117                                                                                                                                                                                                                                                                                                                                                                         |                                                                                                                                                                                                                  |
|             | EUBACTERIA         | a-Proteobacteria                       | Caulobacteriales                                                                                                                                                                                                                         |                                                                                                                                                                                                                                                                                                                                                                                                  | <i>Caulobacter crescentus CB15*</i>                                                                                                                                                                                                                                                                                                                                                                                                          | NP420975, NP419507, NP420163, NP419246, NP418898, NP420606, NP421881, NP420855, NP419926, NP421131, NP422187, NP420854, NP420124, NP420615, NP422248, NP418899, NP421282, NP420614, NP421281, NP420123, NP420934 |
|             |                    |                                        |                                                                                                                                                                                                                                          |                                                                                                                                                                                                                                                                                                                                                                                                  | <i>Agrobacterium tumefaciens str. C58*</i>                                                                                                                                                                                                                                                                                                                                                                                                   | NP356237, NP357132, NP357135, NP353756, NP353529, NP354421, NP354316                                                                                                                                             |
|             |                    |                                        | <i>Aurantimonas sp. SI85-9A1</i>                                                                                                                                                                                                         | ZP01227346, ZP_01227601, ZP01225786, ZP_01228340, ZP01228075, ZP_01226619, ZP_01227381, ZP_01228046, ZP_01228041, ZP_01228300, ZP_01225634                                                                                                                                                                                                                                                       |                                                                                                                                                                                                                                                                                                                                                                                                                                              |                                                                                                                                                                                                                  |
|             |                    |                                        | <i>Bradyrhizobium japonicum USDA 110*</i>                                                                                                                                                                                                | NP769256, NP771059, NP770495, NP769629, NP772095, NP769580, NP770595, NP766760, NP769939, NP773017, NP767622, NP_767621, NP_767662, NP_769944, NP773003, NP774441, NP_773431, NP_773885, NP_773909, NP770077, NP766759, NP_774458, NP_766779, NP_767798, NP_769297, NP_769587, NP_770088 (short), NP_774440, NP_774457, NP_767661, NP_774439 (short), NP_773092, NP_771737, NP_773910, NP_769066 |                                                                                                                                                                                                                                                                                                                                                                                                                                              |                                                                                                                                                                                                                  |
|             |                    |                                        | <i>Brucella melitensis 16M*</i>                                                                                                                                                                                                          | NP_539814, NP540840, NP539606, YP419180, NP_542001, NP_541190, NP_541796, NP_541470, NP_541473, NP_541649, NP_540438                                                                                                                                                                                                                                                                             |                                                                                                                                                                                                                                                                                                                                                                                                                                              |                                                                                                                                                                                                                  |
|             |                    |                                        | <i>Brucella suis 1330*</i>                                                                                                                                                                                                               | NP698090, NP697062, NP699972, NP700248, NP699419, NP699636, NP699969, NP699782, NP697443                                                                                                                                                                                                                                                                                                         |                                                                                                                                                                                                                                                                                                                                                                                                                                              |                                                                                                                                                                                                                  |
|             |                    |                                        | <i>Mesorhizobium loti MAFF303099*</i>                                                                                                                                                                                                    | NP104115, NP107987, NP104278, NP102846, NP106252, NP105773, NP106251, NP106097, NP107374, NP107765                                                                                                                                                                                                                                                                                               |                                                                                                                                                                                                                                                                                                                                                                                                                                              |                                                                                                                                                                                                                  |
|             |                    |                                        | <i>Nitrobacter hamburgensis X14*</i>                                                                                                                                                                                                     | YP576095, YP578577, YP577800, YP576121, YP577533, YP576393                                                                                                                                                                                                                                                                                                                                       |                                                                                                                                                                                                                                                                                                                                                                                                                                              |                                                                                                                                                                                                                  |
|             |                    |                                        | <i>Nitrobacter winogradskyi Nb-255*</i>                                                                                                                                                                                                  | YP317227, YP319620, YP318764, YP317256, YP318617, YP319597                                                                                                                                                                                                                                                                                                                                       |                                                                                                                                                                                                                                                                                                                                                                                                                                              |                                                                                                                                                                                                                  |
|             |                    |                                        | <i>Rhodospseudomonas palustris BisB5*</i>                                                                                                                                                                                                | YP568403, YP567495, YP570815, YP570426, YP570336, YP568387, "YP567906", YP570233, YP570932, YP569335, YP571501, YP571126, YP569334, YP570730, YP567751, YP570817, YP568681, YP571416, YP570673, YP567943, YP567412, YP570674, YP570729, YP567755, YP570728, YP569002, YP571502, YP570742                                                                                                         |                                                                                                                                                                                                                                                                                                                                                                                                                                              |                                                                                                                                                                                                                  |
|             |                    | <i>Sinorhizobium meliloti 1021*</i>    | NP437387, NP437240, NP437985, NP436012, NP386357, NP384640, NP384981, NP385411                                                                                                                                                           |                                                                                                                                                                                                                                                                                                                                                                                                  |                                                                                                                                                                                                                                                                                                                                                                                                                                              |                                                                                                                                                                                                                  |
|             |                    | <i>Xanthobacter autotrophicus Py2*</i> | YP001419588, YP001419150, YP001418956, YP001415817, YP001417091, YP001419543, YP001415225, YP001415821, YP001416251, YP001417578, YP001418152, YP001416604, YP001415099, YP001417580, YP001415533, YP001419323, YP001418073, YP001416170 |                                                                                                                                                                                                                                                                                                                                                                                                  |                                                                                                                                                                                                                                                                                                                                                                                                                                              |                                                                                                                                                                                                                  |
|             |                    | Rhodospirillales                       |                                                                                                                                                                                                                                          | <i>Magnetospirillum magnetotacticum MS-1</i>                                                                                                                                                                                                                                                                                                                                                     | ZP_00054517, ZP00056429, ZP00053318, ZP_00054341, ZP_00056039, ZP_00054900, ZP_00054520, ZP_00052323, ZP_00054042, ZP_00051081, ZP_00048250, ZP_00051919, ZP_00049322, ZP_00208825, ZP_00209699                                                                                                                                                                                                                                              |                                                                                                                                                                                                                  |
|             |                    |                                        | <i>Acidiphilium cryptum JF-5*</i>                                                                                                                                                                                                        | YP_001233995, YP_001235305, YP001235231, YP001234681, YP001233764, YP_001235687, YP_001233399, YP_001233155, YP_001234390, YP_001234698, YP_001233400, YP_001234167                                                                                                                                                                                                                              |                                                                                                                                                                                                                                                                                                                                                                                                                                              |                                                                                                                                                                                                                  |
|             |                    | Rhodobacteriales                       |                                                                                                                                                                                                                                          | <i>Oceanicola batsensis HTCC2597</i>                                                                                                                                                                                                                                                                                                                                                             | ZP_00998629, "ZP_01000711", ZP01000013, ZP_01000014, ZP_00997919, ZP_00998737, ZP_01001389, ZP_01001150, ZP_01000117, ZP_01000052, ZP_00999998, ZP_00998570, ZP_00999896, ZP_01000086, ZP_00999894, ZP_01000056, ZP_01000087, ZP_01000031, ZP_01000061, ZP_00998228, ZP_01000130, ZP_00999967, ZP_00999978, ZP_01000033, ZP_00998506, ZP_00997794, ZP_01000040, ZP_01000071, ZP_00998800, ZP_00998754, ZP_00997746, ZP_01000656, ZP_00997763 |                                                                                                                                                                                                                  |
|             |                    | b-Proteobacteria                       | Burkholderiales                                                                                                                                                                                                                          |                                                                                                                                                                                                                                                                                                                                                                                                  | <i>Burkholderia mallei ATCC 23344*</i>                                                                                                                                                                                                                                                                                                                                                                                                       | YP103644, YP105514, YP103412, YP_102032, YP_103373, YP_104707, YP_104472, YP_103417, YP_105062, YP_338434, YP_105687                                                                                             |
|             |                    |                                        |                                                                                                                                                                                                                                          | <i>Burkholderia pseudomallei 1106a*</i>                                                                                                                                                                                                                                                                                                                                                          | YP_001067460, YP_001075993, YP_001065600, YP_001064354, YP_001076804, YP_001076800, YP_001074862, YP_001065594, YP_001064754, YP_001064755, YP_001067171, YP_001064977, YP_001066955, YP_001076546, YP_001074694, YP_001068248, YP_001075747, YP_001065595, YP_001064510, YP_001064822                                                                                                                                                       |                                                                                                                                                                                                                  |

|                  |                      |                                                |                                                                                      |                                                                                                                                                                                                                                                                                                                                                                                                                                                            |
|------------------|----------------------|------------------------------------------------|--------------------------------------------------------------------------------------|------------------------------------------------------------------------------------------------------------------------------------------------------------------------------------------------------------------------------------------------------------------------------------------------------------------------------------------------------------------------------------------------------------------------------------------------------------|
|                  |                      |                                                | <i>Burkholderia xenovorans</i> LB400*                                                | YP_557145, YP554344, YP557844, YP552619, YP_554221, YP_557466, YP_555521, YP_556795, YP_556966, YP_555850, YP_556064, YP_558248, YP_555552, YP_555018, YP_555764, YP_552604, YP_553418, YP_552759, YP_555903, YP_555865, YP_559999, YP_554917, YP_557013, YP_555680, YP_556081, YP_559617, YP_557840, YP_552608, YP_558025                                                                                                                                 |
|                  |                      |                                                | <i>Polaromonas</i> sp. JS666*                                                        | YP548505, YP550980, YP549773, YP549826, YP_550975, YP_552022, YP_552030, YP_550631, YP_552032, YP_547441, YP_547448, YP_549293, YP_552041, YP_550749, YP_549930, YP_549953, YP_550642, YP_550641, YP_552034, YP_549384, YP_552033, YP_549378, YP_551626                                                                                                                                                                                                    |
|                  |                      |                                                | <i>Ralstonia solanacearum</i> GMI1000*                                               | NP518877, NP_518400, NP520141, NP_522213, NP_518395, NP_518877, NP_522248, NP_521597, NP_518594, NP_519046, NP_520166, NP_520165, NP_518658, NP_518242, NP_519883,                                                                                                                                                                                                                                                                                         |
|                  | Neisseriales         |                                                | <i>Chromobacterium violaceum</i> ATCC 12472*                                         | NP903588, NP901436, NP901754, NP_903486, NP_901455, NP_902393, NP_903806                                                                                                                                                                                                                                                                                                                                                                                   |
| g-Proteobacteria | Alteromonadales      |                                                | <i>Alteromonas macleodii</i> 'Deep ecotype'                                          | ZP01109012, ZP01110833, ZP_01108487, ZP01110585, ZP_01112047, ZP_01112247, ZP_01111819, ZP_01111360, ZP_01111240                                                                                                                                                                                                                                                                                                                                           |
|                  |                      |                                                | <i>Idiomarina loihiensis</i> L2TR*                                                   | YP_154570, YP_155263, YP155876, YP155258, YP_156344, YP_156047, YP_155929, YP_155306,                                                                                                                                                                                                                                                                                                                                                                      |
|                  |                      |                                                | <i>Marinobacter aquaeolei</i> VT8*                                                   | YP960580, YP_959387, YP_959471, YP_959662, YP_959398, YP_960067, YP_959384, YP_960696, YP_960011, YP_961146, YP_960012, YP_960870, YP_957803, YP_961066, YP_960107                                                                                                                                                                                                                                                                                         |
|                  |                      |                                                | <i>Pseudoalteromonas atlantica</i> T6c*                                              | YP663547, YP662487, YP_660529, YP_662281, YP_659901, YP_660218, YP_660239, YP_661387, YP_661263, YP_659691, YP_662062, YP_663337, YP_660987, YP_661490,                                                                                                                                                                                                                                                                                                    |
|                  |                      |                                                | <i>Shewanella denitrificans</i> OS217*                                               | YP564019, YP563248, YP562947, YP_562768, YP_562771, YP_563120                                                                                                                                                                                                                                                                                                                                                                                              |
|                  | Chromatiales         |                                                | <i>Nitrococcus mobilis</i> Nb-231                                                    | ZP_01126975, ZP01128903, ZP_01125661, ZP_01126966, ZP_01128626, ZP_01125543                                                                                                                                                                                                                                                                                                                                                                                |
|                  | Legionellales        |                                                | <i>Legionella pneumophila</i> subsp. <i>pneumophila</i> str. <i>Philadelphia 1</i> * | YP096585, YP095850, YP094903, YP095957, YP_094347, YP_095752, YP_096238                                                                                                                                                                                                                                                                                                                                                                                    |
|                  | Oceanospirillales    |                                                | <i>Marinomonas</i> sp. MED121                                                        | ZP01077471, ZP01075949, ZP01076038, ZP01077340, ZP_01074271, ZP_01078586, ZP_01077340, ZP_01078017, ZP_01077667                                                                                                                                                                                                                                                                                                                                            |
|                  |                      |                                                | <i>Oceanobacter</i> sp. RED65                                                        | ZP01308643, ZP01305662, ZP01306593, ZP_01307102, ZP_01306009, ZP_01306006, ZP_01306518, ZP_01308202, ZP_01306655, ZP_01308203, ZP_01307316,                                                                                                                                                                                                                                                                                                                |
|                  | Pseudomonadales      |                                                | <i>Azotobacter vinelandii</i> AvOP                                                   | ZP00415848, ZP00417247, ZP_00418230, ZP_00417418, ZP_00415433, ZP_00419235, ZP_00418607, ZP_00419974, ZP_00417463, ZP_00415961, ZP_00419941, ZP_00416168, ZP_00415471, ZP_00419942, ZP_00419929,                                                                                                                                                                                                                                                           |
|                  |                      |                                                | <i>Pseudomonas aeruginosa</i> PAO1*                                                  | NP249138, NP250705, NP251240, NP250322, NP253125, NP251242, NP_249437, NP_249878, NP_251579, NP_253666, NP_250226, NP_249570, NP_249975, NP_253874, NP_253681, NP_249198, NP_249199, NP_252888, NP_251505, NP_253682, NP_249197, NP_253707, NP_252283, NP_251240,                                                                                                                                                                                          |
|                  |                      |                                                | <i>Pseudomonas fluorescens</i> PfO-1*                                                | YP_345850, YP_349385, YP_349380, "YP_348598", "YP_348596", YP350424, YP_347541, YP_345850, YP_349676, YP_349380, YP_350895, YP_350898, YP_350894, YP_349912, YP_346184, YP_348478, YP_345973, YP_345972, YP_350671,                                                                                                                                                                                                                                        |
|                  |                      |                                                | <i>Pseudomonas putida</i> KT2440*                                                    | NP742327, NP746190, NP744585, NP744365, "NP_745629", NP_745857, NP_744189, NP_744937, NP_744585, NP_744198, NP_745691, NP_742537, NP_742535, NP_745494, NP_747051, NP_744048, NP_744899, NP_746885, NP_742391, NP_745369, NP_742392                                                                                                                                                                                                                        |
|                  | Xanthomonadales      |                                                | <i>Xanthomonas oryzae</i> pv. <i>oryzae</i> MAFF 311018*                             | YP450437, YP453152, YP450986, YP_450768,                                                                                                                                                                                                                                                                                                                                                                                                                   |
| d-Proteobacteria | Desulfobacteriales   |                                                | <i>Desulfatibacillum alkenivorans</i> AK-01                                          | ZP02131452, ZP_02130911, ZP_02133087, ZP_02134364, ZP_02132390, ZP_02132622, ZP_02132516, ZP_02130410, ZP_02133464, ZP_02129780, ZP_02130458, ZP_02131719, ZP_02134642, ZP_02132539, ZP_02133086, ZP_02130532, ZP_02132180, ZP_02131200, ZP_02132623, ZP_02133772, ZP_02131647, ZP_02132624, ZP_02131517, ZP_02134020, ZP_02130724, ZP_02131516, ZP_02134019, ZP_02134473, ZP_02133775, ZP_02132603, ZP_02134533, ZP_02130355, ZP_02130461, ZP_02134548, + |
|                  |                      | Desulfuromonadales                             | <i>Geobacter metallireducens</i> *                                                   | YP385029, "YP384482", YP386227, YP386244, YP386245, YP384671, YP384666,                                                                                                                                                                                                                                                                                                                                                                                    |
|                  | Myxococcales         |                                                | <i>Anaeromyxobacter dehalogenans</i> 2CP-C*                                          | "YP467319", YP_464875, YP_464874, YP_464857, YP_463573, YP_464343, YP_464627,                                                                                                                                                                                                                                                                                                                                                                              |
|                  |                      |                                                | <i>Sorangium cellulosum</i> 'So ce 56' *                                             | YP_001612630, YP001618275, YP_001611803, "YP_001613492", "YP_001619892", YP_001612636, "YP_001617556", YP_001611224, YP_001617621, YP_001619573, YP_001614215, YP_001616402, YP_001615925, YP_001619453,                                                                                                                                                                                                                                                   |
|                  | Syntrophobacteriales |                                                | <i>Syntrophus aciditrophicus</i> SB*                                                 | YP461117                                                                                                                                                                                                                                                                                                                                                                                                                                                   |
|                  |                      |                                                | <i>Syntrophobacter fumaroxidans</i> *                                                | ZP00666988,                                                                                                                                                                                                                                                                                                                                                                                                                                                |
| Firmicutes       | Bacillales           |                                                | <i>Bacillus</i> sp. SG-1                                                             | ZP01860926, ZP01860927, ZP01859401                                                                                                                                                                                                                                                                                                                                                                                                                         |
|                  |                      |                                                | <i>Bacillus cereus</i> ATCC 10987*                                                   | NP981764, NP981435, NP978690, NP978856, NP981765, NP981159, NP981897, NP979428                                                                                                                                                                                                                                                                                                                                                                             |
|                  |                      |                                                | <i>Geobacillus kaustophilus</i> *                                                    | YP149246, YP146881, YP146050, YP148859, YP147169,                                                                                                                                                                                                                                                                                                                                                                                                          |
|                  |                      |                                                | <i>Lysinibacillus sphaericus</i> C3-41*                                              | YP001696716, YP001696595                                                                                                                                                                                                                                                                                                                                                                                                                                   |
|                  |                      |                                                | <i>Oceanobacillus iheyensis</i> *                                                    | NP693932, NP691595, NP693314                                                                                                                                                                                                                                                                                                                                                                                                                               |
|                  | Clostridiales        |                                                | <i>Carboxydotherrus hydrogeniformans</i> Z-2901*                                     | YP360435, "YP360564", YP360552, YP360430, YP360183, YP360157, YP360557                                                                                                                                                                                                                                                                                                                                                                                     |
| Lactobacillales  |                      | <i>Symbiobacterium thermophilum</i> IAM 14863* | YP076837                                                                             |                                                                                                                                                                                                                                                                                                                                                                                                                                                            |
| Cyanobacteria    | Nostocales           |                                                | <i>Nostoc punctiforme</i> PCC 73102*                                                 | ZP00110259                                                                                                                                                                                                                                                                                                                                                                                                                                                 |

|           |                             |                                           |                                                                                                               |                                                                                                                                                                                                                                                                                                                                                                                                                                                            |
|-----------|-----------------------------|-------------------------------------------|---------------------------------------------------------------------------------------------------------------|------------------------------------------------------------------------------------------------------------------------------------------------------------------------------------------------------------------------------------------------------------------------------------------------------------------------------------------------------------------------------------------------------------------------------------------------------------|
|           |                             | Prochlorales                              | <i>Prochlorococcus marinus</i> *                                                                              | ZP01006748                                                                                                                                                                                                                                                                                                                                                                                                                                                 |
|           | Bacteroidetes               | Flavobacteriales                          | <i>Cellulophaga</i> sp.                                                                                       | ZP01049374, ZP01049097                                                                                                                                                                                                                                                                                                                                                                                                                                     |
|           |                             |                                           | <i>Gramella forsetii</i> KT0803*                                                                              | YP860198, CAL66018                                                                                                                                                                                                                                                                                                                                                                                                                                         |
|           |                             |                                           | <i>Robiginitalea biformata</i>                                                                                | ZP01119543, ZP01122008                                                                                                                                                                                                                                                                                                                                                                                                                                     |
|           |                             |                                           | <i>Tenacibaculum</i> sp.                                                                                      | ZP01053732, ZP01053125, ZP01052679                                                                                                                                                                                                                                                                                                                                                                                                                         |
|           | Sphingobacteriales          | <i>Cytophaga hutchinsonii</i> ATCC 33406* | ZP00309163, YP680165                                                                                          |                                                                                                                                                                                                                                                                                                                                                                                                                                                            |
|           |                             | <i>Salinibacter ruber</i> DSM 13855 *     | YP444269, YP445243, *YP445851*                                                                                |                                                                                                                                                                                                                                                                                                                                                                                                                                                            |
|           | Actinobacteria              | Actinomycetales                           | <i>Brevibacterium linens</i>                                                                                  | ZP00381243, ZP00378270, ZP00381317, ZP00379716                                                                                                                                                                                                                                                                                                                                                                                                             |
|           |                             |                                           | <i>Mycobacterium avium paratuberculosis</i> K-10*                                                             | NP962812, NP962504, NP961343, YP882794, NP963148                                                                                                                                                                                                                                                                                                                                                                                                           |
|           |                             |                                           | <i>Mycobacterium tuberculosis</i> CDC1551*                                                                    | AAK44634, NP334573, NP_337299, NP_335438, NP_337065, NP_335203, NP_337901, NP_334632, NP_337364, NP_335435,                                                                                                                                                                                                                                                                                                                                                |
|           |                             |                                           | <i>Mycobacterium vanbaalenii</i> PYR-1*                                                                       | YP955452, YP952684, YP950973, YP952201, YP952799, YP953258, YP_954872, YP_952548, YP_952314, YP_951076, YP_954872, YP_955368, YP_951750, YP_953258, YP_952802, YP_954988, YP_955626, YP_953383, YP_956493, YP_952719, YP_951195, YP_952684, YP_954993, YP_955629, YP_952733, YP_954983, YP_955452, YP_954126, YP_953162, YP_955983, YP_952732, YP_956033, YP_955734, YP_954789, YP_953688, YP_955037, YP_954945, YP_955161, YP_952789, YP_951093, +20 more |
|           |                             |                                           | <i>Nocardia farcinica</i> IFM 10152*                                                                          | YP121044, YP120037, YP117247, YP119619, YP_118479, YP_119756, *YP_118710*, YP_116648, YP_118449, YP_120565, YP_121544, YP_121255, YP_120037, YP_117247, YP_118387, YP_121547, YP_117214, YP_119760, YP_118767, YP_117439, YP_119256, YP_116741, YP_121044, YP_121637, YP_118481, YP_120708, YP_117137, YP_120890, YP_118301, YP_116654, YP_116690, YP_121638, YP_120707, YP_116656,                                                                        |
|           |                             |                                           | <i>Saccharopolyspora erythraea</i> NRRL 2338*                                                                 | YP_001107571, YP_001104147, YP_001107543, *YP_001104951*, YP001108464, YP_001106189, YP001103704, YP_001106319, YP_001107809, YP_001105054, YP_001106783, YP_001107210, YP_001109123, YP_001105443, YP_001106201, YP_001102916, YP_001105336, YP_001105329, YP_001107226, YP_001105779, YP_001107545, YP_001107337, YP_001104949, YP_001107205, YP_001105673, YP_001105764 (middle domain), YP_001105765                                                   |
|           |                             |                                           | <i>Streptomyces avermitilis</i> *                                                                             | NP827718, NP822556                                                                                                                                                                                                                                                                                                                                                                                                                                         |
|           |                             |                                           | <i>Streptomyces avermitilis</i> MA-4680*                                                                      | NP827718, NP827790, NP828095, NP827776, NP826203, NP_823091, NP_826452, NP_823743, NP_826457, NP_828304, NP_823482, NP_821894, NP_822522, NP_825042, NP_822556, NP_825011, NP_828316, NP_822442, NP_825016, NP_827372, NP_824998, NP_825389, NP_828317, NP_825567, NP_823299, NP_825526                                                                                                                                                                    |
|           |                             |                                           | <i>Streptomyces coelicolor</i> A3(2) *                                                                        | NP626022, NP625964, NP630859, NP625975, NP_627009, NP_625710, NP_625498, NP_627272, NP_630552, NP_630863, NP_627004, NP_628551, NP_630001, NP_630100, NP_624639, NP_629821, NP_631004, NP_625488, NP_625405                                                                                                                                                                                                                                                |
|           |                             |                                           | <i>Thermobifida fusca</i> YX*                                                                                 | YP289129, YP290541, YP289571                                                                                                                                                                                                                                                                                                                                                                                                                               |
|           | Rubrobacteriales            | <i>Rubrobacter xylanophilus</i> DSM*      | YP645127, YP644518, YP644639, YP643163, YP644818, YP645194, YP645157, YP645462, YP645020, YP644479, YP645221, |                                                                                                                                                                                                                                                                                                                                                                                                                                                            |
|           | Spirochaetes                | Spirochaetales                            | <i>Leptospira biflexa</i> sr. Patoc s. 'Patoc1 (Paris)' *                                                     | YP001839673, YP001837480, YP001840225, YP001838507, YP001837527, YP001838531, YP001840674, YP001840658, YP001838647, YP001840445                                                                                                                                                                                                                                                                                                                           |
|           | Chloroflexi                 | Chloroflexales                            | <i>Roseiflexus</i> sp. RS-1*                                                                                  | ZP01380090, ZP01359693, *ZP01359996*, ZP01358526, ZP01357380, ZP01357639, ZP01357103                                                                                                                                                                                                                                                                                                                                                                       |
|           | Deinococcus-Thermus         | Deinococcales                             | <i>Deinococcus radiodurans</i> R1*                                                                            | NP285660, NP294274, NP285519, *NP295042*, NP294646, NP294979, NP295267, NP296082, NP285573                                                                                                                                                                                                                                                                                                                                                                 |
|           |                             | Thermales                                 | <i>Thermus thermophilus</i> HB27*                                                                             | YP004410, *YP004511*, YP004213, YP004752, YP005521, YP005544,                                                                                                                                                                                                                                                                                                                                                                                              |
| EUKARYOTA | Euglenozoa                  | Kinetoplastida                            | <i>Leishmania major</i>                                                                                       | XP_001680859, XP_848047, XP_843378, XP_001684536*                                                                                                                                                                                                                                                                                                                                                                                                          |
|           |                             |                                           | <i>Trypanosoma cruzi</i> CL Brener*                                                                           | XP816465, EAN87142, XP816595, XP815330, XP812975, XP813955                                                                                                                                                                                                                                                                                                                                                                                                 |
|           | Diatom: Bacillariophyta     | Thalassiosirales                          | <i>Thalassiosira pseudonana</i> ^                                                                             | 139965, 127584, 154794, 150079, 113439                                                                                                                                                                                                                                                                                                                                                                                                                     |
|           | Ciliophora                  | Hymenostomatida                           | <i>Tetrahymena thermophila</i> SB210^                                                                         | XP001019797, XP001033489, *XP001016521*, XP001025535, XP001021683, XP001007958,                                                                                                                                                                                                                                                                                                                                                                            |
|           | Viridiplantae: Chlorophyta  | Mamiellales                               | <i>Ostreococcus lucimarinus</i> ^                                                                             | 9253                                                                                                                                                                                                                                                                                                                                                                                                                                                       |
|           | Viridiplantae: Streptophyta | Brassicales                               | <i>Arabidopsis thaliana</i> *                                                                                 | at3g51840, NP187337, NP190116,                                                                                                                                                                                                                                                                                                                                                                                                                             |
|           |                             | Brassicales                               | <i>Tropaeolum majus</i>                                                                                       | AAT11172                                                                                                                                                                                                                                                                                                                                                                                                                                                   |
|           |                             | Fabales                                   | <i>Pisum sativum</i>                                                                                          | CAB55554                                                                                                                                                                                                                                                                                                                                                                                                                                                   |
|           |                             | Poales                                    | <i>Oryza sativa japonica</i> group*                                                                           | XP550215, XP479496, AAS90672,                                                                                                                                                                                                                                                                                                                                                                                                                              |
|           |                             | Solanales                                 | <i>Solanum tuberosum</i> -p                                                                                   | Q9FS88, Q9FS87,                                                                                                                                                                                                                                                                                                                                                                                                                                            |
|           | Mycetozoa                   | Dictyosteliida                            | <i>Dictyostelium discoideum</i> ^                                                                             | XP639044, XP643912, XP641504, XP636630, XP639286, XP643912,                                                                                                                                                                                                                                                                                                                                                                                                |
|           | Fungi: Ascomycota           | Eurotiales                                | <i>Aspergillus fumigatus</i> ^                                                                                | EAL92964, EAL91945, EAL91706, EAL90816                                                                                                                                                                                                                                                                                                                                                                                                                     |
|           |                             | Hypocreales                               | <i>Gibberella zeae</i> PH-1 -p                                                                                | XP390980, XP385316, XP389837                                                                                                                                                                                                                                                                                                                                                                                                                               |
|           |                             | Magnaporthaceae                           | <i>Magnaporthe grisea</i> ^                                                                                   | XP363077, XP366464, XP363106                                                                                                                                                                                                                                                                                                                                                                                                                               |
|           |                             | Saccharomycetales                         | <i>Yarrowia lipolytica</i> CLIB122*                                                                           | XP505801, XP503869, XP501919, XP502873, XP502873                                                                                                                                                                                                                                                                                                                                                                                                           |
|           |                             | Sordariales                               | <i>Neurospora crassa</i> ^                                                                                    | EAA30699, XP961547, XP329316, XP326398                                                                                                                                                                                                                                                                                                                                                                                                                     |
|           | Fungi: Basidiomycota        | Agaricales                                | <i>Coprinopsis cinerea</i> okayama7#130^                                                                      | EAU91667, EAU88714, XP001836950, XP001836878                                                                                                                                                                                                                                                                                                                                                                                                               |
|           |                             | Tremellales                               | <i>Cryptococcus neoformans</i> v. <i>neoformans</i> JEC21*                                                    | XP571996, XP567497, XP567164, XP567619, XP_567618, XP502873                                                                                                                                                                                                                                                                                                                                                                                                |

|                          |                   |               |                                       |                                                                                                                                                      |
|--------------------------|-------------------|---------------|---------------------------------------|------------------------------------------------------------------------------------------------------------------------------------------------------|
|                          |                   | Ustilaginales | <i>Ustilago maydis-p</i>              | EAK82198, XP760980, XP762547, XP757196, XP762332                                                                                                     |
| Cnidaria                 | Actiniaria        |               | <i>Nematostella vectensis^</i>        | 159736, 164768, 102677, 194219, 154495, 247336, 131297, 226991, 125111, 179916, 154243, 118418,                                                      |
| Nematoda                 | Ascaridida        |               | <i>Ascaris suum</i>                   | AAA16096, AAC48316                                                                                                                                   |
|                          | Rhabditida        |               | <i>Caenorhabditis briggsae-p</i>      | CAP37120, CAE6456, CAP31945, CAE57903, CAE69691, CAE59190, CAE69690, CAE59136, CAE67208, CAE67197, CAE67225                                          |
|                          |                   |               | <i>Caenorhabditis elegans^</i>        | Q20772, NP504508, NP500720, NP491942, NP498885, NP001022062, NP510789, NP495142, NP510788, NP493832, NP491871, NP491886, AAK21433, NP495066, T15532, |
| Arthropoda               | Diptera           |               | <i>Aedes aegypti^</i>                 | EAT34089, EAT45617, XP001649744, EAT44503, EAT40743, XP001648811                                                                                     |
|                          |                   |               | <i>Anopheles gambiae^</i>             | XP316942, XP308965, XP314895, XP314701, XP315683, XP318878,                                                                                          |
|                          |                   |               | <i>Drosophila melanogaster^</i>       | AAL13534, NP648239, NP611409, NP650840, NP650163, Q9VSA3, NP649069                                                                                   |
|                          | Coleoptera        |               | <i>Tribolium castaneum^</i>           | XP971662, XP966406, XP972925, XP970506, XP974064, XP974092, XP971884, XP966609                                                                       |
|                          | Hymenoptera       |               | <i>Apis mellifera^</i>                | XP393736, XP391840, XP395491, XP623170, XP392111, XP393211                                                                                           |
| Echinodermata            | Echinoidea        |               | <i>Strongylocentrotus purpuratus^</i> | XP785958, XP796528, XP781501, XP792854, XP789655, XP796748, XP782503, XP785005, X22A9FA,                                                             |
| Chordata: Actinopterygii | Cypriniformes     |               | <i>Danio rerio-p</i>                  | AAH63972, NP956472, AAH45426, NP997776, AAH95385, AAH71366, NP957475, NP957449, AAH79521, NP998254, XP001338184                                      |
|                          | Tetraodontiformes |               | <i>Tetraodon nigroviridis^</i>        | CAG03309, CAG04285, CAG10520, CAG00726, CAF96970, CAF98217, CAG08903, CAG05384, CAF95465, CAF95757                                                   |
| Chordata: Sarcopterygii  | Anura             |               | <i>Xenopus laevis-p</i>               | AAH77194, AAH94479, AAH77618, AAH77524, AAH56845, AAH55986, AAH81056, AAH82665                                                                       |
|                          |                   |               | <i>Xenopus tropicalis-p</i>           | NP001016289, AAH88561, 279816, 279732, NP001015788, NP001039250, NP989269, CAJ81939,                                                                 |
|                          | Galliformes       |               | <i>Gallus gallus^</i>                 | CAG32712, XP420942, CAG32225, CAG32200, XP417879, CAG31537, CAG31873                                                                                 |
|                          | Rodentia          |               | <i>Mus musculus^</i>                  | Q60759, AAH45199, AAH27825, AAH27198, P50544, NP766266, P51174, BAC36757, Q07417, P45952, Q9DBL1                                                     |
|                          | Primates          |               | <i>Homo sapiens^</i>                  | Q92947, AAH19607, NP079523, AA52711, P28330, Q9H845, P49748, P11310, AAH25963, Q9UKU7, NP001600,                                                     |
|                          | Cetartiodactyla   |               | <i>Bos taurus^</i>                    | NP001039404, NP001029554, AAI03105, AAI05214, XP588758, NP001070404, NP001029573, NP001017933, NP001069019, NP001068703                              |
