# Supplementary material
Source: PubMed Central journal article supplement (PMC4136416)
Supplement: NIHMS613491-supplement-Supp_3.pdf [file NIHMS613491-supplement-Supp_3.pdf]

**Supplementary Table 3 – Taxonomic distribution of homologs to human GCD, IVD, ACAD10/11, VLCAD/ACAD9, and IBD.** Taxa marked as in Table 2. The identification of a homolog is based on results of phylogenetic analyses (recovered in monophyletic clades as in Fig.1). Homologs from additional taxa were identified by applying strict rule of 45% or more identity to ACAD homologs identified in phylogenetic analyses.

| Superkindom     | Supergroup       | Phylum/Class/other                                | Order                                                                 | Species                                     | GCD | IVD | ACAD 10/11 | VLCAD/ACAD9 | LCAD | IBD |  |
|-----------------|------------------|---------------------------------------------------|-----------------------------------------------------------------------|---------------------------------------------|-----|-----|------------|-------------|------|-----|--|
| ARCHAEA         | Crenarchaeota    |                                                   | Desulfurococcales                                                     | <i>Aeropyrum pernix K1*</i>                 |     |     |            |             |      |     |  |
|                 |                  |                                                   | Thermoproteales                                                       | <i>Pyrobaculum aerophilum str. IM2*</i>     |     |     |            |             |      |     |  |
|                 | Euryarchaeota    | Archaeoglobi                                      |                                                                       | <i>Archaeoglobus fulgidus DSM 4304*</i>     |     |     |            |             |      |     |  |
|                 |                  |                                                   | Halobacteriales                                                       | <i>Haloarcula marismortui ATCC 43049*</i>   |     |     |            |             |      |     |  |
|                 |                  |                                                   | <i>Halobacterium sp. NRC-1*</i>                                       |                                             |     |     |            |             |      |     |  |
|                 |                  |                                                   | <i>Natronomonas pharaonis DSM 2160*</i>                               |                                             |     |     |            |             |      |     |  |
|                 |                  | Thermoplasmatales                                 | <i>Picrophilus torridus DSM 9790*</i>                                 |                                             |     |     |            |             |      |     |  |
|                 |                  | <i>Thermoplasma acidophilum DSM 1728*</i>         |                                                                       |                                             |     |     |            |             |      |     |  |
| EUBACTERIA      | a-Proteobacteria | Caulobacteriales                                  |                                                                       | <i>Caulobacter crescentus CB15*</i>         |     |     |            |             |      |     |  |
|                 |                  |                                                   |                                                                       | <i>Agrobacterium tumefaciens str. C58*</i>  |     |     |            |             |      |     |  |
|                 |                  | Rhizobiales                                       |                                                                       | <i>Aurantimonas sp. SI85-9A1</i>            |     |     |            |             |      |     |  |
|                 |                  |                                                   |                                                                       | <i>Bradyrhizobium japonicum USDA 110*</i>   |     |     |            |             |      |     |  |
|                 |                  |                                                   |                                                                       | <i>Brucella melitensis 16M*</i>             |     |     |            |             |      |     |  |
|                 |                  |                                                   |                                                                       | <i>Brucella suis 1330*</i>                  |     |     |            |             |      |     |  |
|                 |                  |                                                   |                                                                       | <i>Mesorhizobium loti MAFF303099*</i>       |     |     |            |             |      |     |  |
|                 |                  |                                                   |                                                                       | <i>Nitrobacter hamburgensis X14*</i>        |     |     |            |             |      |     |  |
|                 |                  |                                                   |                                                                       | <i>Nitrobacter winogradskyi Nb-255*</i>     |     |     |            |             |      |     |  |
|                 |                  |                                                   |                                                                       | <i>Rhodopseudomonas palustris BisB5*</i>    |     |     |            |             |      |     |  |
|                 |                  |                                                   |                                                                       | <i>Sinorhizobium meliloti 1021*</i>         |     |     |            |             |      |     |  |
|                 |                  |                                                   |                                                                       | <i>Xanthobacter autotrophicus Py2*</i>      |     |     |            |             |      |     |  |
|                 |                  | Rhodospirillales                                  | <i>Magnetospirillum magnetotacticum MS-1</i>                          |                                             |     |     |            |             |      |     |  |
|                 |                  | <i>Acidiphilium cryptum JF-5*</i>                 |                                                                       |                                             |     |     |            |             |      |     |  |
|                 | Rhodobacteriales | <i>Oceanicola batsensis HTCC2597</i>              |                                                                       |                                             |     |     |            |             |      |     |  |
|                 | b-Proteobacteria | Burkholderiales                                   |                                                                       | <i>Burkholderia mallei ATCC 23344*</i>      |     |     |            |             |      |     |  |
|                 |                  |                                                   |                                                                       | <i>Burkholderia pseudomallei 1106a*</i>     |     |     |            |             |      |     |  |
|                 |                  |                                                   |                                                                       | <i>Burkholderia xenovorans LB400*</i>       |     |     |            |             |      |     |  |
|                 |                  |                                                   |                                                                       | <i>Polaromonas sp. JS666*</i>               |     |     |            |             |      |     |  |
|                 |                  |                                                   |                                                                       | <i>Ralstonia solanacearum GMI1000*</i>      |     |     |            |             |      |     |  |
|                 | Neisseriales     | <i>Chromobacterium violaceum ATCC 12472*</i>      |                                                                       |                                             |     |     |            |             |      |     |  |
|                 | g-Proteobacteria | Alteromonadales                                   |                                                                       | <i>Alteromonas macleodii 'Deep ecotype'</i> |     |     |            |             |      |     |  |
|                 |                  |                                                   |                                                                       | <i>Idiomarina loihiensis L2TR*</i>          |     |     |            |             |      |     |  |
|                 |                  |                                                   |                                                                       | <i>Marinobacter aquaeolei VT8*</i>          |     |     |            |             |      |     |  |
|                 |                  |                                                   |                                                                       | <i>Pseudoalteromonas atlantica T6c*</i>     |     |     |            |             |      |     |  |
|                 |                  |                                                   |                                                                       | <i>Shewanella denitrificans OS217*</i>      |     |     |            |             |      |     |  |
|                 |                  | Chromatiales                                      | <i>Nitrococcus mobilis Nb-231</i>                                     |                                             |     |     |            |             |      |     |  |
|                 |                  | Legionellales                                     | <i>Legionella pneumophila subsp. pneumophila str. Philadelphia 1*</i> |                                             |     |     |            |             |      |     |  |
|                 |                  | Oceanospirillales                                 | <i>Marinomonas sp. MED121</i>                                         |                                             |     |     |            |             |      |     |  |
|                 |                  |                                                   | <i>Oceanobacter sp. RED65</i>                                         |                                             |     |     |            |             |      |     |  |
|                 |                  | Pseudomonadales                                   |                                                                       | <i>Azotobacter vinelandii AvOP</i>          |     |     |            |             |      |     |  |
|                 |                  |                                                   | <i>Pseudomonas aeruginosa PAO1*</i>                                   |                                             |     |     |            |             |      |     |  |
|                 |                  |                                                   | <i>Pseudomonas fluorescens PFO-1*</i>                                 |                                             |     |     |            |             |      |     |  |
|                 |                  |                                                   | <i>Pseudomonas putida KT2440*</i>                                     |                                             |     |     |            |             |      |     |  |
|                 | Xanthomonadales  | <i>Xanthomonas oryzae pv. oryzae MAFF 311018*</i> |                                                                       |                                             |     |     |            |             |      |     |  |
|                 | d-Proteobacteria | Desulfobacteriales                                |                                                                       | <i>Desulfatibacillum alkenivorans AK-01</i> |     |     |            |             |      |     |  |
|                 |                  |                                                   |                                                                       | <i>Geobacter metallireducens *</i>          |     |     |            |             |      |     |  |
|                 |                  | Myxococcales                                      |                                                                       | <i>Anaeromyxobacter dehalogenans 2CP-C*</i> |     |     |            |             |      |     |  |
|                 |                  |                                                   |                                                                       | <i>Sorangium cellulosum 'So ce 56' *</i>    |     |     |            |             |      |     |  |
|                 |                  | Syntrophobacteriales                              | <i>Syntrophus aciditrophicus SB*</i>                                  |                                             |     |     |            |             |      |     |  |
|                 |                  | <i>Syntrophobacter fumaroxidans*</i>              |                                                                       |                                             |     |     |            |             |      |     |  |
|                 | Firmicutes       | Bacillales                                        |                                                                       | <i>Bacillus sp. SG-1</i>                    |     |     |            |             |      |     |  |
|                 |                  |                                                   |                                                                       | <i>Bacillus cereus ATCC 10987*</i>          |     |     |            |             |      |     |  |
|                 |                  |                                                   | <i>Geobacillus kaustophilus*</i>                                      |                                             |     |     |            |             |      |     |  |
|                 |                  |                                                   | <i>Lysinibacillus sphaericus C3-41*</i>                               |                                             |     |     |            |             |      |     |  |
|                 |                  |                                                   | <i>Oceanobacillus iheyensis*</i>                                      |                                             |     |     |            |             |      |     |  |
| Clostridiales   |                  | <i>Carboxydotherrnus hydrogeniformans Z-2901*</i> |                                                                       |                                             |     |     |            |             |      |     |  |
| Lactobacillales |                  | <i>Symbiobacterium thermophilum IAM 14863*</i>    |                                                                       |                                             |     |     |            |             |      |     |  |
