# Supplementary material
Source: PubMed Central journal article supplement (PMC4136416)
Supplement: NIHMS613491-supplement-Supplementary_data1.pdf [file NIHMS613491-supplement-Supplementary_data1.pdf]

| Domain     | Preliminary analysis                                                                                                                                                                                                                                                                                                                       |                                                                                                                                                                            | Combined analysis (all ACAD species)                                                                                                                                                                                                                                                             |                                                                                                                                                                          |
|------------|--------------------------------------------------------------------------------------------------------------------------------------------------------------------------------------------------------------------------------------------------------------------------------------------------------------------------------------------|----------------------------------------------------------------------------------------------------------------------------------------------------------------------------|--------------------------------------------------------------------------------------------------------------------------------------------------------------------------------------------------------------------------------------------------------------------------------------------------|--------------------------------------------------------------------------------------------------------------------------------------------------------------------------|
|            | Species                                                                                                                                                                                                                                                                                                                                    | Taxonomy                                                                                                                                                                   | Species                                                                                                                                                                                                                                                                                          | Taxonomy                                                                                                                                                                 |
| Archaea    | <i>Archaeoglobus fulgidus</i> *<br><i>Halobacterium sp.</i><br><i>Thermoplasma acidophilum</i> *                                                                                                                                                                                                                                           | Archaeoglobi<br>Halobacteriales<br>Thermoplasmatales                                                                                                                       | <i>Aeropyrum pernix</i><br><i>Pyrobaculum aerophilum</i><br><i>Natronomonas pharaonis</i><br><i>Picrophilus torridus</i>                                                                                                                                                                         | Desulfurococcales<br>Thermoproteales<br>Halobacteriales<br>Thermoplasmatales                                                                                             |
| Eubacteria | <i>Bacillus cereus</i><br><i>Geobacillus kaustophilus</i><br><i>Geobacter metallireducens</i>                                                                                                                                                                                                                                              | Bacillales<br>Bacillales<br>Deltaproteobacteria                                                                                                                            | <i>Agrobacterium tumefaciens</i><br><i>Brucella suis</i><br><i>Nitrobacter winogradskyi</i><br><i>Legionella pneumophila</i><br><i>Carboxydotherrnus hydrogeniformans</i><br><i>Nostoc punctiforme</i><br><i>Salinibacter ruber</i><br><i>Rubrobacter xylanophilus</i><br><i>Roseiflexus sp.</i> | Alphaproteobacteria<br>Alphaproteobacteria<br>Alphaproteobacteria<br>Gamaproteobacteria<br>Firmicutes<br>Cyanobacteria<br>Bacteroidetes<br>Actinobacteria<br>Chloroflexi |
| Eukaryota  | <i>Trypanosoma cruzi</i> ,<br><i>Arabidopsis thaliana</i><br><i>Oryza sativa</i><br><i>Dictyostelium discoideum</i> *<br><i>Yarrowia lipolytica</i> *<br><i>Aspergillus fumigatus</i><br><i>Cryptococcus neoformans</i><br><i>Caenorhabditis elegans</i><br><i>Drosophila melanogaster</i><br><i>Mus musculus</i><br><i>Homo sapiens</i> * | Euglenozoa<br>Viridiplantae<br>Viridiplantae<br>Mycetozoa<br>Fungi:Ascomycota<br>Fungi:Ascomycota<br>Fungi:Basidiomycota<br>Nematoda<br>Arthropoda<br>Chordata<br>Chordata | <i>Leishmania major</i><br><i>Thalassiosira pseudonana</i><br><i>Tetrahymena thermophila</i><br><i>Nematostella vectensis</i>                                                                                                                                                                    | Euglenozoa<br>Diatom<br>Ciliophora<br>Cnidaria                                                                                                                           |

**Supplementary Table 1 - Taxa examined in preliminary and combined phylogenetic analyses.** Taxa marked with a star show species used in both analyses.
